# Supplementary material for: Reusable isotype heterojunction g-C 3 N 4 /alginate hydrogel spheres for photocatalytic wastewater treatment
Source: Royal Society of Chemistry journal article supplement (doi:10.1039/d4ra02876g), 2024-01-01
Supplement: d4ra02876g1.pdf [file d4ra02876g1.pdf]

## **Reusable isotype heterojunction g-C<sub>3</sub>N<sub>4</sub>/alginate hydrogel spheres for photocatalytic wastewater treatment**

Yuito Narita<sup>a</sup>, Kento Nishi<sup>b</sup>, Tatsushi Matsuyama<sup>b</sup>, Junichi Ida<sup>b,\*</sup>

<sup>a</sup>Environmental Engineering for Symbiosis, Graduate School of Science and Engineering, Soka

University, 1-236 Tangi-cho, Hachioji-shi, Tokyo 192-8577, Japan

<sup>b</sup>Department of Science and Engineering for Sustainable Innovation, Faculty of Science and Engineering,

Soka University, 1-236 Tangi-cho, Hachioji-shi, Tokyo 192-8577, Japan

\*Corresponding author: Email: [ida@soka.ac.jp](mailto:ida@soka.ac.jp)

### **Contents**

1. Characterization of g-C<sub>3</sub>N<sub>4</sub> synthesized from different raw materials
2. Change in elastic modulus of g-C<sub>3</sub>N<sub>4</sub>/Alg beads under visible light irradiation

## 1. Characterization of g-C<sub>3</sub>N<sub>4</sub> synthesized from different raw materials

### Methods

Sample Hydrodynamic diameters were measured by dynamic light scattering (DLS) using a Beckman Coulter (Brea, CA, USA) DelsaMax Pro. Simultaneously, sample electrophoretic mobilities in ultrapure water were measured, and the zeta potential was determined based on the following Smoluchowski equation (Eq. 1):

$$v = \varepsilon \zeta E / \mu \quad (1)$$

where  $v$  is the electrophoretic mobility,  $\varepsilon$  is the dielectric constant of the solvent,  $\zeta$  is the zeta potential,  $E$  is the electric field, and  $\mu$  is the viscosity of the solvent.

**Table S1.** Characterization of g-C<sub>3</sub>N<sub>4</sub> synthesized from different raw materials.

| Samples | Band gap (eV) | BET specific surface                   | Hydrodynamic  | Zeta potential (mV) |
|---------|---------------|----------------------------------------|---------------|---------------------|
|         |               | area (m <sup>2</sup> g <sup>-1</sup> ) | diameter (nm) |                     |
| CN-TU   | 2.68          | 78.56                                  | 1204          | -42.16              |
| CN-MU   | 2.60          | 37.68                                  | 918           | -53.46              |
| CN-U    | 2.72          | 64.94                                  | 615           | -47.13              |
| CN-T    | 2.58          | 23.01                                  | 1247          | -55.04              |
| CN-M    | 2.54          | 9.67                                   | 1220          | -57.24              |

## 2. Change in elastic modulus of g-C<sub>3</sub>N<sub>4</sub>/Alg beads under visible light irradiation

### Method

The compressive strength of the beads was measured using an A&D (Tokyo, Japan) STB-1225S universal testing machine equipped with a load cell (50 N). The elastic modulus was determined based on the data within 0–20% of the strain range by using the following Hertz model (Eq. 1):

$$F = 4/3 ED^{0.5}\Delta D^{1.5} \quad (1)$$

where  $F$  is the load,  $E$  is the modulus of elasticity,  $D$  is the bead diameter, and  $\Delta D$  is the displacement.

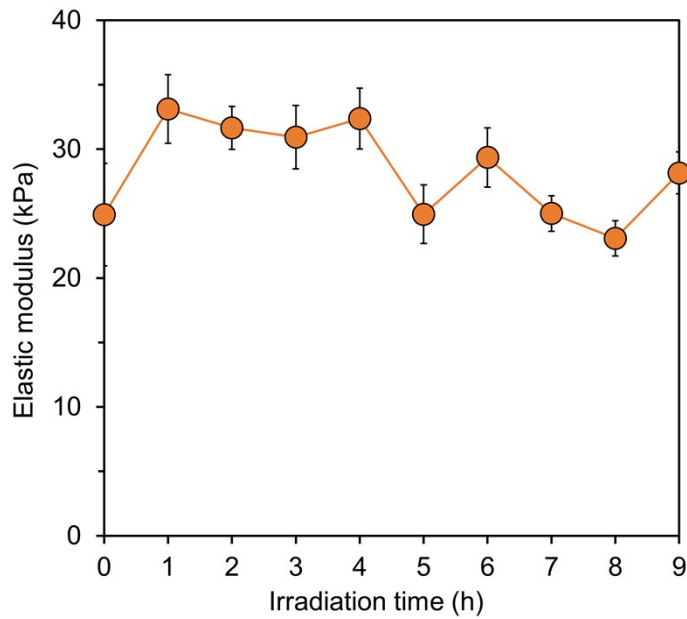

**Fig. S1.** Change in elastic modulus of g-C<sub>3</sub>N<sub>4</sub>/Alg beads under visible light irradiation.

Table S2. Law data of the change in elastic modulus of g-C<sub>3</sub>N<sub>4</sub>/Alg beads under visible light irradiation.

| Irradiation time | Elastic modulus | Standard deviation | Standard error |
|------------------|-----------------|--------------------|----------------|
| 0                | 24.9271981      | 8.891465           | 3.97638411     |
| 1                | 33.11307109     | 8.416879           | 2.661650899    |
| 2                | 31.64961679     | 5.294959           | 1.674413068    |
| 3                | 30.93135632     | 7.788527           | 2.462948519    |
| 4                | 32.37571681     | 7.488759           | 2.368153416    |
| 5                | 24.95205858     | 7.177919           | 2.269857393    |
| 6                | 29.35887487     | 7.281164           | 2.302506251    |
| 7                | 25.01293693     | 4.363725           | 1.379930988    |
| 8                | 23.07607978     | 4.327327           | 1.368420803    |
| 9                | 28.15718441     | 5.120694           | 1.619305524    |
